# Supplementary material for: A RUNX-targeted gene switch-off approach modulates the BIRC5/PIF1-p21 pathway and reduces glioblastoma growth in mice
Source: PubMed Central journal article supplement (PMC9463152; doi:10.1038/s42003-022-03917-5), 2022-09-09
Supplement: 42003_2022_3917_MOESM3_ESM.pdf [file 42003_2022_3917_MOESM3_ESM.pdf]

## Description of Additional Supplementary Files

**File name:** Supplementary Data 1

**Description:** Raw data.
